# Supplementary material
Source: PubMed Central journal article supplement (PMC3683807)
Supplement: supp_me.2012-1296_ME-12-1296_-Supplemental_Data_rev_final.pdf [file supp_me.2012-1296_ME-12-1296_-Supplemental_Data_rev_final.pdf]

## Supplemental Data

| Generation 1                                                                                                                                                      | Generation 2                                                                                                                                                       | Generation 3                                                                          |      |
|-------------------------------------------------------------------------------------------------------------------------------------------------------------------|--------------------------------------------------------------------------------------------------------------------------------------------------------------------|---------------------------------------------------------------------------------------|------|
| ♂ wt;Amhr2-Cre<br>♀ Foxo1 <sup>fl/fl</sup>                                                                                                                        | ♂ Foxo1 <sup>fl/+</sup> ;Amhr2-Cre<br>♀ Foxo1 <sup>fl/fl</sup>                                                                                                     | ♂/♀ Foxo1 <sup>fl/fl</sup> ;Amhr2-Cre                                                 | (1)  |
| ♂ wt;Amhr2-Cre<br>♀ Foxo3 <sup>fl/fl</sup>                                                                                                                        | ♂ Foxo3 <sup>fl/+</sup> ;Amhr2-Cre<br>♀ Foxo3 <sup>fl/fl</sup>                                                                                                     | ♂/♀ Foxo3 <sup>fl/fl</sup> ;Amhr2-Cre                                                 | (2)  |
| ♂ wt;Amhr2-Cre<br>♀ Foxo1 <sup>fl/fl</sup> ;Foxo3 <sup>fl/fl</sup> ;Foxo4 <sup>fl/fl</sup>                                                                        | ♂ Foxo1 <sup>fl/+</sup> ;Foxo3 <sup>fl/+</sup> ;Foxo4 <sup>fl</sup> ;Amhr2-Cre<br>♀ Foxo1 <sup>fl/fl</sup> ;Foxo3 <sup>fl/fl</sup> ;Foxo4 <sup>fl/fl</sup>         | ♂/♀ Foxo1 <sup>fl/fl</sup> ;Foxo3 <sup>fl/fl</sup> ;Foxo4 <sup>fl/fl</sup> ;Amhr2-Cre | (3)  |
| ♂ wt;Gdf9-Cre<br>♀ Foxo1 <sup>fl/fl</sup>                                                                                                                         | ♂ Foxo1 <sup>fl/fl</sup><br>♀ Foxo1 <sup>fl/+</sup> ;Gdf9-Cre                                                                                                      | ♀ Foxo1 <sup>fl/-</sup>                                                               | (4)  |
| ♂ wt;Gdf9-Cre<br>♀ Foxo3 <sup>fl/fl</sup>                                                                                                                         | ♂ Foxo1 <sup>fl/fl</sup><br>♀ Foxo3 <sup>fl/+</sup> ;Gdf9-Cre                                                                                                      | ♀ Foxo3 <sup>fl/-</sup>                                                               | (5)  |
| ♂ wt;Gdf9-Cre<br>♀ Foxo1 <sup>fl/fl</sup> ;Foxo3 <sup>fl/fl</sup> ;Foxo4 <sup>fl/fl</sup>                                                                         | ♂ Foxo1 <sup>fl/fl</sup> ;Foxo3 <sup>fl/fl</sup> ;Foxo4 <sup>fl</sup><br>♀ Foxo1 <sup>fl/+</sup> ;Foxo3 <sup>fl/+</sup> ;Foxo4 <sup>fl/+</sup> ;Gdf9-Cre           | ♀ Foxo1 <sup>fl/-</sup> ;Foxo3 <sup>fl/-</sup> ;Foxo4 <sup>fl/-</sup>                 | (6)  |
| ♂ Foxo1 <sup>fl/fl</sup> ;Amhr2-Cre (1)<br>♀ Foxo1 <sup>fl/-</sup> (4)                                                                                            | ♂/♀ Foxo1 <sup>fl/-</sup> ;Amhr2-Cre                                                                                                                               |                                                                                       | (7)  |
| ♂ Foxo3 <sup>fl/fl</sup> ;Amhr2-Cre (2)<br>♀ Foxo3 <sup>fl/-</sup> (5)                                                                                            | ♂/♀ Foxo3 <sup>fl/-</sup> ;Amhr2-Cre                                                                                                                               |                                                                                       | (8)  |
| ♂ Foxo1 <sup>fl/fl</sup> ;Foxo3 <sup>fl/fl</sup> ;Foxo4 <sup>fl</sup> ;Amhr2-Cre (3)<br>♀ Foxo1 <sup>fl/-</sup> ;Foxo3 <sup>fl/-</sup> ;Foxo4 <sup>fl/-</sup> (6) | ♂ Foxo1 <sup>fl/-</sup> ;Foxo3 <sup>fl/-</sup> ;Foxo4 <sup>fl</sup> ;Amhr2-Cre<br>♀ Foxo1 <sup>fl/-</sup> ;Foxo3 <sup>fl/-</sup> ;Foxo4 <sup>fl/-</sup> ;Amhr2-Cre |                                                                                       | (9)  |
| ♂ Foxo1 <sup>fl/-</sup> ;Amhr2-Cre (7)<br>♀ Foxo1 <sup>fl/-</sup> ;Foxo3 <sup>fl/-</sup> ;Foxo4 <sup>fl/-</sup> (6)                                               | Select to remove Foxo4 floxed allele<br>Select to remove Foxo3 floxed allele                                                                                       | ♂/♀ Foxo1 <sup>fl/-</sup> ;Foxo3 <sup>fl/-</sup> ;Amhr2-Cre                           | (10) |
|                                                                                                                                                                   |                                                                                                                                                                    | ♂/♀ Foxo1 <sup>fl/-</sup> ;Foxo3 <sup>fl/-</sup>                                      | (11) |
|                                                                                                                                                                   |                                                                                                                                                                    | ♂/♀ Foxo1 <sup>fl/-</sup> ;Foxo4 <sup>fl/-</sup> ;Amhr2-Cre                           | (12) |
|                                                                                                                                                                   |                                                                                                                                                                    | ♂/♀ Foxo1 <sup>fl/-</sup> ;Foxo4 <sup>fl/-</sup>                                      | (13) |
| ♂ wt;Cyp19-Cre<br>♀ Foxo1 <sup>fl/-</sup> ;Foxo3 <sup>fl/-</sup> (13)                                                                                             | ♂ Foxo1 <sup>fl/+</sup> ;Foxo3 <sup>fl/+</sup> ;Cyp19-Cre<br>♀ Foxo1 <sup>fl/-</sup> ;Foxo3 <sup>fl/-</sup> (13)                                                   | ♂/♀ Foxo1 <sup>fl/-</sup> ;Foxo3 <sup>fl/-</sup> ;Cyp19-Cre                           | (14) |

### Maintenance breeding scheme I for Foxo1<sup>fl/-</sup>;Foxo3<sup>fl/-</sup>; Amhr2-Cre : (same for Foxo1<sup>fl/-</sup>;Foxo3<sup>fl/-</sup>;Cyp19-Cre)

|                                                                |                                                                          |                                           |
|----------------------------------------------------------------|--------------------------------------------------------------------------|-------------------------------------------|
| ♂ Foxo1 <sup>fl/-</sup> ;Foxo3 <sup>fl/-</sup> ;Amhr2-Cre (12) | ♀ Foxo1 <sup>fl/-</sup> ;Foxo3 <sup>fl/-</sup> (13)                      | (Only showing potential female genotypes) |
| ♀ Foxo1 <sup>fl/-</sup> ;Foxo3 <sup>fl/-</sup> (control)       | ♀ Foxo1 <sup>fl/-</sup> ;Foxo3 <sup>fl/-</sup> ; Amhr2-Cre (Foxo1/3 dKO) | (10)                                      |
| ♀ Foxo1 <sup>fl/-</sup> ;Foxo3 <sup>fl/fl</sup> (control)      | ♀ Foxo1 <sup>fl/-</sup> ;Foxo3 <sup>fl/fl</sup> ; Amhr2-Cre              | (15)                                      |
| ♀ Foxo1 <sup>fl/-</sup> ;Foxo3 <sup>fl/-</sup> (discard)       | ♀ Foxo1 <sup>fl/-</sup> ;Foxo3 <sup>fl/-</sup> ;Amhr2-Cre                | (16)                                      |
| ♀ Foxo1 <sup>fl/fl</sup> ;Foxo3 <sup>fl/-</sup> (control)      | ♀ Foxo1 <sup>fl/fl</sup> ;Foxo3 <sup>fl/-</sup> ;Amhr2-Cre (discard)     |                                           |
| ♀ Foxo1 <sup>fl/fl</sup> ;Foxo3 <sup>fl/fl</sup> (control)     | ♀ Foxo1 <sup>fl/fl</sup> ;Foxo3 <sup>fl/fl</sup> ;Amhr2-Cre (discard)    |                                           |
| ♀ Foxo1 <sup>fl/fl</sup> ;Foxo3 <sup>fl/-</sup> (discard)      | ♀ Foxo1 <sup>fl/fl</sup> ;Foxo3 <sup>fl/-</sup> ;Amhr2-Cre (discard)     |                                           |

### Maintenance breeding scheme II for Foxo1<sup>fl/-</sup>;Foxo3<sup>fl/-</sup>; Amhr2-Cre : (same for Foxo1<sup>fl/-</sup>;Foxo3<sup>fl/-</sup>;Cyp19-Cre)

|                                                                |                                                                          |                                           |
|----------------------------------------------------------------|--------------------------------------------------------------------------|-------------------------------------------|
| ♂ Foxo1 <sup>fl/-</sup> ;Foxo3 <sup>fl/-</sup> ;Amhr2-Cre (12) | ♀ Foxo1 <sup>fl/-</sup> ;Foxo3 <sup>fl/fl</sup> (13)                     | (Only showing potential female genotypes) |
| ♀ Foxo1 <sup>fl/-</sup> ;Foxo3 <sup>fl/-</sup> (control)       | ♀ Foxo1 <sup>fl/-</sup> ;Foxo3 <sup>fl/-</sup> ; Amhr2-Cre (Foxo1/3 dKO) | (10)                                      |
| ♀ Foxo1 <sup>fl/-</sup> ;Foxo3 <sup>fl/fl</sup> (control)      | ♀ Foxo1 <sup>fl/-</sup> ;Foxo3 <sup>fl/fl</sup> ; Amhr2-Cre              | (15)                                      |
| ♀ Foxo1 <sup>fl/fl</sup> ;Foxo3 <sup>fl/-</sup> (control)      | ♀ Foxo1 <sup>fl/fl</sup> ;Foxo3 <sup>fl/-</sup> ;Amhr2-Cre (discard)     |                                           |
| ♀ Foxo1 <sup>fl/fl</sup> ;Foxo3 <sup>fl/fl</sup> (control)     | ♀ Foxo1 <sup>fl/fl</sup> ;Foxo3 <sup>fl/fl</sup> ;Amhr2-Cre (discard)    |                                           |

### Supplemental Figure 1: Outlined breeding scheme of *Foxe* mutant mice.

Briefly, we obtained the *Foxo1<sup>fl/fl</sup>*, *Foxo3<sup>fl/fl</sup>*, and *Foxo1<sup>fl/fl</sup>; Foxo3<sup>fl/fl</sup>; Foxo4<sup>fl/fl</sup>* mice (1) from Dr. Diego H. Castrillon, *Amhr2-Cre* mice (2) from Dr. Richard R. Behringer, and *Gdf9-Cre* mice (3) from Dr. Austin J. Cooney. The *Cyp19-Cre* mice, originally generated at Organon (4), have been characterized and developed in our own laboratory.

We initially mated the *Foxo1<sup>fl/fl</sup>*, *Foxo3<sup>fl/fl</sup>*, and *Foxo1<sup>fl/fl</sup>; Foxo3<sup>fl/fl</sup>; Foxo4<sup>fl/fl</sup>* female mice (1) to *Amhr2-Cre+* males (2) to generate *Foxo1<sup>fl/fl</sup>; Amhr2-Cre* (**Line 1**), *Foxo3<sup>fl/fl</sup>; Amhr2-Cre* (**Line 2**) and *Foxo1<sup>fl/fl</sup>; Foxo3<sup>fl/fl</sup>; Foxo4<sup>fl/fl</sup>; Amhr2-Cre* (**Line 3**) mice. These mice are viable and fertile, likely due to the low efficiency of *Amhr2-Cre*.

To overcome this, we employed a strategy used by many (5-7) to generate germ-line depletion of *Foxo1* and *Foxo3* alleles. Specifically *Gdf9-Cre+* males (3) were crossed with *Foxo1<sup>fl/fl</sup>* and *Foxo3<sup>fl/fl</sup>* mice to generate germ-line depletion of the *Foxo1* and *Foxo3* alleles (**Line 4, 5 and 6**). These mice were then crossed with the mice carrying *Amhr2-Cre* to ultimately obtain the mice with one null allele as well as the *Amhr2-Cre* gene, as illustrated (**Line 7, 8, and 9**). (Notice: *Foxo4* is on chromosome X. So in the male, it has just one allele, as demonstrated in Line 9. In the following lines, this was not pointed out again as the female and male were mentioned together in Line 12 and 13).

As *Foxo4* is not critical for the ovarian function, we removed the *Foxo4* floxed allele from the triple mutant strains and maintained it as wild type allele to get the *Foxo1* and *Foxo3* double mutant mice (**Line 10 and 11**). **Line 10 is our experimental line, designated as *Foxo1/3* dKO.**

The same strategy was used to get *Foxo1* and *Foxo4* double mutant mice (**Line 12 and 13**). These mice were similar to the *Foxo1* single mutant mice (data not shown).

To support the observed phenotype in *Amhr2-Cre* strains and to exclude the possibility that the phenotype was due to leakage of *Amhr2-Cre* in other tissues, we also used *Cyp19-Cre* mice (4) to generate the *Foxo1<sup>fl/fl</sup>; Foxo3<sup>fl/fl</sup>; Cyp19-Cre* (**Line 14**). The *Cyp19* promoter is more ovarian-granulosa-cell-specific but expressed at a later stage of follicle development than *Amhr2-Cre*. These mice exhibit same phenotype as *Foxo1<sup>fl/fl</sup>; Foxo3<sup>fl/fl</sup>; Amhr2-Cre* mice.

Two breeding strategies were used to generate and maintain the appropriate mutant mice. The male *Foxo1<sup>fl/fl</sup>; Foxo3<sup>fl/fl</sup>; Amhr2-Cre* mice were fertile and used for breeding. In the first scheme, female *Foxo1<sup>fl/fl</sup>; Foxo3<sup>fl/fl</sup>* mice were used to obtain the *Foxo3* germ line depletion mice: *Foxo1<sup>fl/fl</sup>; Foxo3<sup>fl/fl</sup>; Amhr2-Cre* (**Line 16**). In the second scheme, female *Foxo1<sup>fl/fl</sup>; Foxo3<sup>fl/fl</sup>* mice were used to generate more *Foxo1<sup>fl/fl</sup>; Foxo3<sup>fl/fl</sup>; Amhr2-Cre* (**Line 10**) and *Foxo1<sup>fl/fl</sup>; Foxo3<sup>fl/fl</sup>; Amhr2-Cre* (**Line 15**) mice.

### References:

1. Paik JH, Kollipara R, Chu G, Ji H, Xiao Y, Ding Z, Miao L, Tothova Z, Horner JW, Carrasco DR, Jiang S, Gilliland DG, Chin L, Wong WH, Castrillon DH, DePinho RA 2007 FoxOs are lineage-restricted redundant tumor suppressors and regulate endothelial cell homeostasis. *Cell* 128:309-323
2. Jamin SP, Arango NA, Mishina Y, Hanks MC, Behringer RR 2002 Requirement of Bmpr1a for Mullerian duct regression during male sexual development. *Nat Genet* 32:408-410

3. Lan ZJ, Xu X, Cooney AJ 2004 Differential oocyte-specific expression of Cre recombinase activity in GDF-9-iCre, Zp3cre, and Msx2Cre transgenic mice. *Biol Reprod* 71:1469-1474
4. Fan HY, Liu Z, Cahill N, Richards JS 2008 Targeted disruption of Pten in ovarian granulosa cells enhances ovulation and extends the life span of luteal cells. *Mol Endocrinol* 22:2128-2140
5. Pangas SA, Jorgez CJ, Tran M, Agno J, Li X, Brown CW, Kumar TR, Matzuk MM 2007 Intraovarian activins are required for female fertility. *Mol Endocrinol* 21:2458-2471
6. Pangas SA, Li X, Umans L, Zwijsen A, Huylebroeck D, Gutierrez C, Wang D, Martin JF, Jamin SP, Behringer RR, Robertson EJ, Matzuk MM 2008 Conditional deletion of Smad1 and Smad5 in somatic cells of male and female gonads leads to metastatic tumor development in mice. *Mol Cell Biol* 28:248-257
7. Li Q, Pangas SA, Jorgez CJ, Graff JM, Weinstein M, Matzuk MM 2008 Redundant roles of SMAD2 and SMAD3 in ovarian granulosa cells in vivo. *Mol Cell Biol* 28:7001-7011

Fig 2a

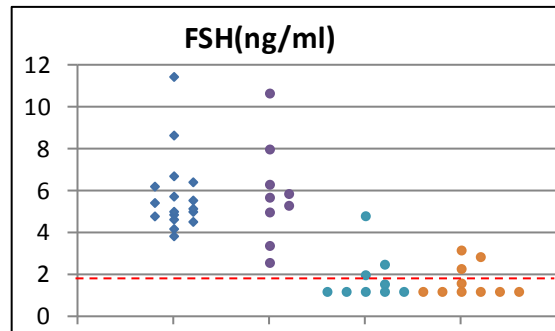

S2b

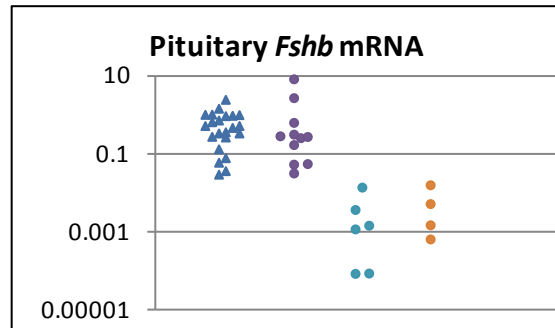

S2c

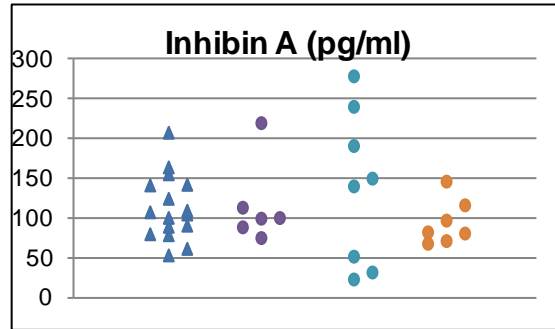

- ▲ Wt-d25
- Wt-2 month
- *Foxo1*<sup>-/-</sup>;*Foxo3*<sup>-/-</sup>;*Amhr2-cre*-2 month
- *Foxo1*<sup>-/-</sup>;*Foxo3*<sup>-/-</sup>;*Cyp19-cre*-2 month

**Supplemental Figure 2: *Foxo1/3* dKO mice have reduced serum FSH levels, reduced pituitary *Fshb* mRNA expression, yet comparable serum inhibin A levels.**

A: Serum FSH levels were significantly reduced in both *Foxo1/3* dKO (*Amhr2-Cre*) and *Foxo1/3* dKO (*Cyp19-Cre*) mice.

B: Pituitary *Fshb* mRNA levels were significantly reduced in both *Foxo1/3* dKO (*Amhr2-Cre*) and *Foxo1/3* dKO (*Cyp19-Cre*) mice.

C: Serum inhibin A levels were comparable in control mice, *Foxo1/3* dKO (*Amhr2-Cre*) and *Foxo1/3* dKO (*Cyp19-Cre*) mice ( $P > 0.4$  for both when compared to control samples).

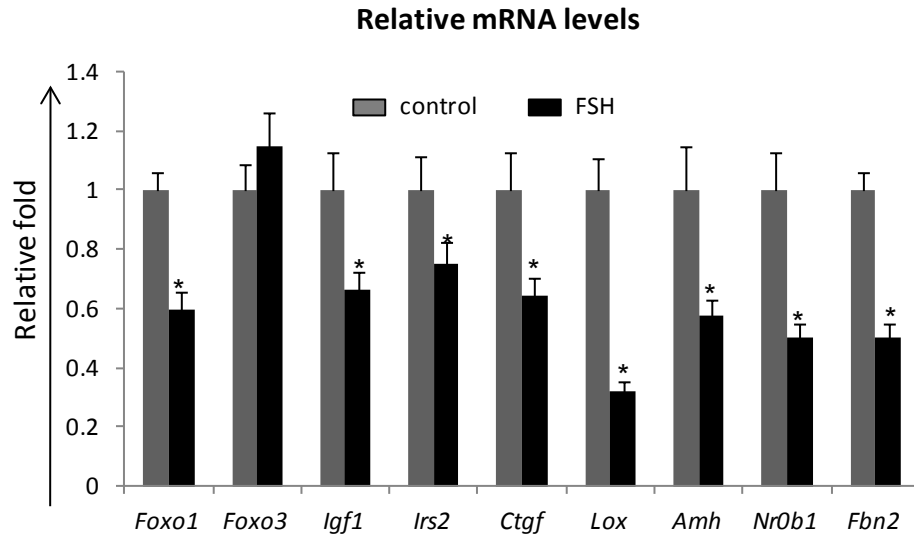

**Supplemental Figure 3: FSH down regulates FOXO1 and *Foxo1/3* target genes.**

Granulosa cells were isolated from wild type mice and cultured with or without FSH (100ng/ml) for 24h. RNA was isolated and mRNA transcripts were measured by qPCR. The values shown represent the mean fold induction from 3 experiments. Asterisk \* denotes genes significantly down-regulated by FSH.

**Supplemental Table 1: Primer Sets for Real-time RT-PCR.**

| <b>Gene</b>    | <b>Primer-Forward</b> | <b>Primer-Reverse</b> |
|----------------|-----------------------|-----------------------|
| <i>Amh</i>     | ACCCCTCAACCAAGCAGAGA  | AAGCGAGTGAGGGTCTCTAGG |
| <i>Bcl2l11</i> | TTCCAATTGGATTCACACCA  | GCTGCAATTGTCCACCTTCT  |
| <i>BMP2</i>    | GCTCCACAAACGAGAAAAGC  | AGCAAGGGGAAAAGGACACT  |
| <i>Cga</i>     | TTGCTTCTCCAGGGCATATC  | GCGCTCAGAAGCTACGACTT  |
| <i>Ctgf</i>    | AAGACACATTTGGCCAGAC   | GACAGGCTTGGCGATTTTAG  |
| <i>Egr1</i>    | GAGCGAACAAACCCTATGAGC | AGGCCACTGACTAGGCTGAA  |
| <i>Fbn2</i>    | GAATGGGCTTCAACAAAGGA  | TACGCTCTCCAGGCTGATTT  |
| <i>Fos</i>     | GGGGCAAAGTAGAGCAGCTA  | GGCTGCCAAAATAAACTCCA  |
| <i>FosB</i>    | AAAACAAACAAACCCGCAAG  | AGAAAACCAGAGACGGAGCA  |
| <i>Foxl2</i>   | ACATGTTTCGAGAAGGGCAAC | GCCAGGAGTTGTTGAGGAAC  |
| <i>Foxo1</i>   | GTGAACACCATGCCTCACAC  | TGGACTGCTCCTCAGTTCCT  |
| <i>Foxo1</i>   | TATTGAGCGCTTGGACTGTG  | TGGACTGCTCCTCAGTTCCT  |
| <i>Foxo4</i>   | CAGTGACCTCATGGATGGTG  | GAGGGCTCAAGGAGGAAAAG  |
| <i>Fst</i>     | AGAGGTCGCTGCTCTCTCTG  | TCCTCCTCCTCCTTTCCTC   |
| <i>Gata2</i>   | GCACCTGTTGTGCAAATTGT  | GCCCCTTTCTTGCTCTTCTT  |
| <i>Gh</i>      | CTGGCTGCTGACACCTACAA  | AAGCGAAGCAATTCCATGTC  |
| <i>Igf1</i>    | TGGATGCTCTTCAGTTCGTG  | GTCTTGGGCATGTCAGTGTG  |
| <i>INHA</i>    | ATGCACAGGACCTCTGAACC  | GGATGGCCGGAATACATAAG  |
| <i>INHBA</i>   | ATCATCACCTTTGCCGAGTC  | CCCTTTAAGCCCATTTCCCTC |
| <i>INHBB</i>   | CGAGATCATCAGCTTTGCAG  | TCCACCTTCTTCTCCACCAC  |
| <i>Irs2</i>    | GTAGTTCAGGTCGCCTCTGC  | CAGCTATTGGGACCACCACT  |
| <i>Jun</i>     | AAAACCTTGAAAGCGCAAAA  | CGCAACCAGTCAAGTTCTCA  |
| <i>Junb</i>    | GCAGCTACTTTTCGGGTCAG  | TTCATCTTGTGCAGGTCGTC  |
| <i>Klf5</i>    | GCCAGTTAATTCGCCAACTC  | GGTGCACTTGTAGGGCTTCT  |
| <i>Lhb</i>     | AGTTCTGCCAGTCTGCATC   | GACCCCCACAGTCAGAGCTA  |
| <i>Lhcgr</i>   | CTGAAAACCTTGCCCTCCAG  | AATCGTAATCCCAGCCACTG  |
| <i>Lox</i>     | CAGGGATTGAGTCCTGGATG  | ACTGGGAACTGGGCTTCTTT  |
| <i>Mapk10</i>  | GATGAAAGGGAGCACACCAT  | AGTGTGAGATGCGAGGGTCT  |
| <i>Pdk4</i>    | GCTTGCCAAATTTCTCGTCTC | CCTGCTTGGGATACACCAGT  |
| <i>Pomc</i>    | GAAGATGCCGAGATTCTGCT  | TTTTCAGTCAGGGGCTGTTC  |
| <i>Prl</i>     | CAAGGAACAAGCCCTGAAAG  | ATCCCATTTCTTTGGCTTC   |
| <i>Star</i>    | AGAGGTTCCACCTGTGTGCT  | GGTTGGCGAACTCTATCTGG  |
| <i>Tshb</i>    | TCAACACCACCATCTGTGCT  | TCTGACAGCCTCGTGTATGC  |

**Supplemental Table 2:**  
**Verification of microarray data for selected genes by qPCR.**

| Gene Symbol                    | Foxo-d25/wt<br>(array/qPCR) | Foxo-2m/wt<br>(array/qPCR) |
|--------------------------------|-----------------------------|----------------------------|
| <b>Foxo family members</b>     |                             |                            |
| <i>Foxo1</i>                   | -6.7 -8.2                   | -40.6 -66.8                |
| <i>Foxo3</i>                   | 1.9 -12.9                   | 1.4 -8.4                   |
| <i>Foxo4</i>                   | -1.1 -3.1                   | -1.1 -48.6                 |
| <b>TGF beta family</b>         |                             |                            |
| <i>Inha</i>                    | 1 1                         | 1 1.4                      |
| <i>Inhba</i>                   | 1.4 2.1                     | 1.2 2.1                    |
| <i>Inhbb</i>                   | 1.2 1.4                     | 1.1 1.7                    |
| <i>Fst</i>                     | -1.1 1.1                    | -1.9 -1.9                  |
| <i>Gdf9</i>                    | 1.9 3.5                     | -1.3 1.1                   |
| <b>Steroids</b>                |                             |                            |
| <i>Cyp11a1</i>                 | 1.6 2.4                     | 5.2 11.5                   |
| <i>Cyp17a1</i>                 | 1.9 3.6                     | 9.9 33                     |
| <i>Cyp19a1</i>                 | -2.2 -2.3                   | -1.1 2.2                   |
| <i>Akr1c14</i>                 | -2.3 -2.1                   | -3.5 -3.6                  |
| <i>Star</i>                    | -1.6 -1.1                   | 5.2 16.2                   |
| <b>Transcription Factor</b>    |                             |                            |
| <i>Nr0b1</i>                   | -3.5 -2.9                   | -5.5 -3.4                  |
| <i>Nr5a1</i>                   | -1.5 -1.1                   | 1.6 3.1                    |
| <i>Nr5a2</i>                   | -2.1 1                      | -2.3 1                     |
| <b>Apoptosis</b>               |                             |                            |
| <i>Arnt2</i>                   | -1.9 -1.6                   | -5.1 -4.4                  |
| <i>Bcat1</i>                   | -5.0 -3.0                   | -10.6 -6.9                 |
| <i>Bcl2l11</i>                 | -1.5 -3.8                   | -1.5 -4.9                  |
| <i>Mapk10</i>                  | -2.1 -2                     | -2.5 -1.9                  |
| <b>Cancer</b>                  |                             |                            |
| <i>Myc</i>                     | -2.1 -1.6                   | -3.5 -2.9                  |
| <i>Trp53</i>                   | -1.5 -1.1                   | -1.8 -1.2                  |
| <b>DNA damage</b>              |                             |                            |
| <i>Gadd45a</i>                 | -2.1 -8.1                   | -2.6 -4.5                  |
| <b>Other genes of Interest</b> |                             |                            |
| <i>Stc1</i>                    | 24.7 66.1                   | 19.1 51.1                  |
| <i>Mylk</i>                    | 4.2 9.6                     | 5.3 16.9                   |
| <i>Fbn2</i>                    | -6.0 -5.2                   | -9.2 -9.8                  |
| <i>Rgs13</i>                   | -5.8 -3.9                   | -5.2 -4                    |
| <i>Fshr</i>                    | 1.3 1.9                     | 1.2 2.1                    |
| <i>Lhcgr</i>                   | 1.7 2.4                     | 5.5 14.8                   |
| <i>Ccnd2</i>                   | -1.4 -1.3                   | -1.9 -1.6                  |
| <i>Ctgf</i>                    | -2.4 -2.2                   | -2.8 -2.3                  |
| <i>Hoxc8</i>                   | 2.7 3.4                     | 3.3 6.1                    |
| <i>Hoxd8</i>                   | 2.6 4.6                     | 4.7 9.7                    |
| <i>Igflr</i>                   | -2 -2.4                     | -2.6 -3.6                  |

Note: Data are the average fold change for the indicated samples.

**Supplemental Table 3: Top bio functions of genes changed in d25 dKO samples.**

| Category                   | Gene Names                                                                                                                                                                                                                         | # Genes |
|----------------------------|------------------------------------------------------------------------------------------------------------------------------------------------------------------------------------------------------------------------------------|---------|
| Cardiovascular Disease     | ANGPT2,BCAN,BCAT1,CASQ2,CDH13,CNTF,CRYAB,CTNNA2,DDAH1,FAM19A5,FAM40B,FHL2,FOXO1,FOXP1,HBA1/HBA2,IRS2,ITIH5,KCNQ5,LIMCH1,LRP8,MTUS2,MYBPC3,MYLK,MYOM1,NT5E,PDE5A,PIK3R1,PLA2G5,PLN,PNPT1,RGS13,SERPINA5,SLC25A48,THBS2,TNNC1,UNC13D | 36      |
| Gastrointestinal Disease   | CNTF,CXCL2,FOXO1,IRS2,MYLK,NEU3,NT5E,PDE5A,PIK3R1,SERPINA1,SMPX,THBS4,TNNC1                                                                                                                                                        | 13      |
| Developmental Disorder     | ANGPT2,CASQ2,CNTF,CRYAB,FHL2,H19,ITGA7,MYBPC3,MYOM1,NR0B1,NT5E,PDE5A,PIK3R1,PLN                                                                                                                                                    | 14      |
| Endocrine System Disorders | BCAT1,CD7,CDH13,CNTF,CTNNA2,DDAH1,FAM19A5,FOXO1,FOXO4,FOXP1,HBA1/HBA2,IRS2,ITIH5,KCNQ5,LIMCH1,LRP8,MTUS2,MYLK,MYOM1,NEU3,NR0B1,PDE5A,PIK3R1,SERPINA1,SERPINA5,SPECC1,TDGF1,TRIM15                                                  | 28      |
| Metabolic Disease          | ASS1,CNTF,FOXO1,FOXO4,IRS2,NEU3,PIK3R1                                                                                                                                                                                             | 7       |



**Supplemental Table 4: Top bio functions of genes changed in 2 month old *Foxo1/3dKO* mice.**

| Category                   | Gene Names                                                                                                                                                                                                                                                                                                                                                                                                                                                                                                                                                                                                                                                                                                                                                                                                                                                                                                                                                                      | # Genes |
|----------------------------|---------------------------------------------------------------------------------------------------------------------------------------------------------------------------------------------------------------------------------------------------------------------------------------------------------------------------------------------------------------------------------------------------------------------------------------------------------------------------------------------------------------------------------------------------------------------------------------------------------------------------------------------------------------------------------------------------------------------------------------------------------------------------------------------------------------------------------------------------------------------------------------------------------------------------------------------------------------------------------|---------|
| Cancer                     | 1600029D21Rik, ADH1C, ADM, AGTR1, ALDH1A1, ANG, AOC3, BCAN, BCL11A, CAMK2N1, CAPN6, CDH5, CENPA, Clca1/Clca2, CTSC, CXCL2, CXCR7, CYP11A1, CYP17A1, CYTIP, DPYSL4, EDN1, EFEMP1, EFS, ENPEP, EPHX1, ETS1, FBN2, FHL2, FOLR1, FOXO1, FOXO4, FST, FUBP1, H19, HMGA2, HSD17B11, HSD17B3, IGF1R, IL13RA1, IRS2, ITIH5, JAK1, KCNJ5, KCNK2, KRT20, LGALS3, LHCGR, LRP8, MAF, MGLL, MLF1, MSI1, MYC, MYF5, NR0B1, NR3C1, NRP1, PDE5A, PDK4, PIK3R1, PLP1, RGNEF, RNASEL, SECTM1, SERPINA3, SERPINA5, SLC9A3R1, SMC4, ST5, STAR, STAT1, STC1, SULT1A1, TDGF1, TEK, TGM2, TLR2, TM4SF1, TNC, TNS4, TUBA8, ZBTB16                                                                                                                                                                                                                                                                                                                                                                        | 83      |
| Cardiovascular Disease     | ABLIM1, ADAMTS19, ADM, AFF3, AGTR1, ALDH1A1, ANK2, AOC3, AQP2, BCAN, BCAT1, BCL11A, CASQ2, CNTF, CNTN4, COL9A2, CTSC, CXCR7, DDAH1, DNAH7, EDN1, ENPEP, EPHX1, ETS1, FBN2, FGD5, FHL2, FOLR1, FOXO1, HJURP, HMGA2, IGF1R, IRS2, ITIH5, JPH1, KCNJ5, KCNK2, KCNQ5, LHCGR, LIMCH1, LRP8, MGLL, MLF1, MSI1, MYH6, MYLK, MYOM1, NCF2, NR3C1, PDE5A, PID1, PIK3R1, PLN, PPP1R12B, RGS13, RNFI182, SERPINA5, SLC26A7, SYBU, TAC1, TEK, TLR2, TNFAIP6, TNNT2, TUBA8, UNC13D                                                                                                                                                                                                                                                                                                                                                                                                                                                                                                            | 66      |
| Developmental Disorder     | ADM, AGTR1, ALDH1A1, ANK2, CASQ2, CNTF, COL9A2, CTSC, CYP11A1, EDN1, FBN2, FHL2, FST, H19, HMGA2, IGF1R, KCNJ5, LGALS3, LHCGR, MYC, MYH6, MYOM1, NR0B1, PDE5A, PIK3R1, PLN, STC1, TLR2, TNNT2, WNT4                                                                                                                                                                                                                                                                                                                                                                                                                                                                                                                                                                                                                                                                                                                                                                             | 30      |
| Endocrine System Disorders | ABLIM1, AFF3, AGTR1, ALDH1A1, ANK2, AOC3, BCAT1, CENPE, CNTF, CNTN4, COL27A1, CXCR7, CYP11A1, CYP17A1, DDAH1, DNAH7, EFEMP1, ETS1, FADS2, FAM129A, FBN2, FOXO1, FOXO4, FST, HSD17B3, IGF1R, IRS2, ITIH5, KCNJ5, KCNK1, KCNQ5, LGALS3, LHCGR, LIMCH1, LRP8, MLF1, MYC, MYLK, MYOM1, NCF2, NR0B1, NR3C1, NRP1, NTNG1, PDE5A, PIK3R1, PLAGL1, PLCH1, PPP1R12B, RGNEF, SERPINA3, SERPINA5, SPEC1, STAR, TDGF1, TGM2, TMEFF1, TNNT2, TUBA8, ZBTB16, ZNF385B                                                                                                                                                                                                                                                                                                                                                                                                                                                                                                                          | 61      |
| Genetic Disorder           | ABCD2, ABLIM1, ADAMTS19, ADH1C, ADM, AFF3, AGTR1, ALAS2, ALDH1A1, ANG, ANK2, AOC3, AQP2, ARNT2, BCAN, BCAT1, BCL11A, CAMK2N1, CAPN6, CASQ2, CDC42EP3, CENPA, CENPE, CNTF, CNTN4, COL14A1, COL27A1, COL9A2, CTSC, CXCL2, CXCR7, CYP11A1, CYP17A1, CYTIP, DDAH1, DNAH7, EDN1, EFEMP1, ENPEP, EPHX1, FADS2, FAM129A, FAM81A, FBN2, FGD5, FHL2, FOLR1, FOXO1, FST, FUBP1, FXYD1, H19, HJURP, HLA-DMB, HMGA2, HSD17B11, HSD17B3, IGF1R, IL13RA1, IRS2, ITIH5, IVNS1ABP, JAK1, JPH1, KCNJ5, KCNK1, KCNK2, KCNQ5, KRT20, LDB3, LGALS3, LHCGR, LIMCH1, LRP8, LRRC3B, MAF, MGLL, MLF1, MYC, MYH6, MYLK, MYOM1, NCF2, NR0B1, NR3C1, NRP1, NTNG1, PDE5A, PDK4, PIK3R1, PLA2G1B, PLAGL1, PLN, PLP1, PPARGC1B, PPP1R12B, PTPRB, RGNEF, RGS13, RNASEL, SERPINA3, SERPINA5, SLC26A7, SLC9A3R1, SLCO2A1, SLITRK1, SMC4, SNCAIP, SPEC1, STAR, STAT1, SULT1A1, SYBU, TAC1, TDGF1, TEK, TGM2, TLR2, TMEFF1, TMPRSS13, TNC, TNFAIP6, TNNT2, TNS4, TUBA8, TUFT1, UBA7, UNC13D, WNT4, ZBTB16, ZNF385B | 131     |

**Supplemental Table 5:  
Number of putative transcription factor  
DNA binding response elements in the  
proximal promoters of genes of interest.**

| Gene promoter                                   | SMAD | FOXO | SP1 | AP1 | SF1 |
|-------------------------------------------------|------|------|-----|-----|-----|
| <b>Growth-related Genes</b>                     |      |      |     |     |     |
| <i>Ctgf(ccn2)*</i>                              | 1    | 6    | 1   | 1   | 0   |
| <i>Amh</i>                                      | 1    | 2    | 6   | 0   | 4   |
| <i>Lox</i>                                      | 5    | 2    | 6   | 0   | 1   |
| <i>Foxo1</i>                                    | 1    | 2    | 8   | 0   | 0   |
| <i>Foxo3</i>                                    | 1    | 1    | 13  | 4   | 0   |
| <i>Igf1</i>                                     | 4    | 9    | 4   | 20  | 2   |
| <i>Nr0b1*</i>                                   | 0    | 3    | 1   | 0   | 0   |
| <i>Inhba</i>                                    | 1    | 3    | 1   | 2   | 0   |
| <i>Irs2</i>                                     | 2    | 9    | 20  | 4   | 2   |
| <b>Metabolism &amp; Apoptosis-related Genes</b> |      |      |     |     |     |
| <i>Bmp2</i>                                     | 2    | 2    | 7   | 0   | 0   |
| <i>Klf5*</i>                                    | 1    | 6    | 9   | 2   | 1   |
| <i>Bcl2l1(Bim)*</i>                             | 1    | 1    | 13  | 1   | 0   |
| <i>Mapk10</i>                                   | 1    | 3    | 7   | 6   | 1   |
| <i>Pdk4*</i>                                    | 2    | 2    | 4   | 3   | 1   |

Note: Putative transcription factor DNA binding response elements in the proximal promoters (-800bp) of growth-related, metabolism and apoptosis-related genes. \*Denotes genes known to be up-regulated by FOXO1. The results are summarized according to the promoter information obtained from Genomatix (<http://www.genomatix.de/en/index.html>).
